# Supplementary material for: Formononetin reshapes the gut microbiota, prevents progression of obesity and improves host metabolism
Source: Royal Society of Chemistry journal article supplement (doi:10.1039/d1fo02942h), 2021-01-01
Supplement: d1fo02942h1.pdf [file d1fo02942h1.pdf]

a

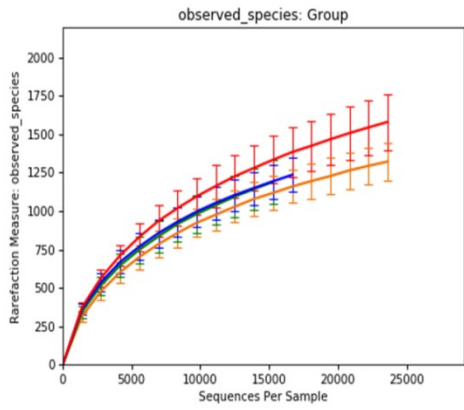

b

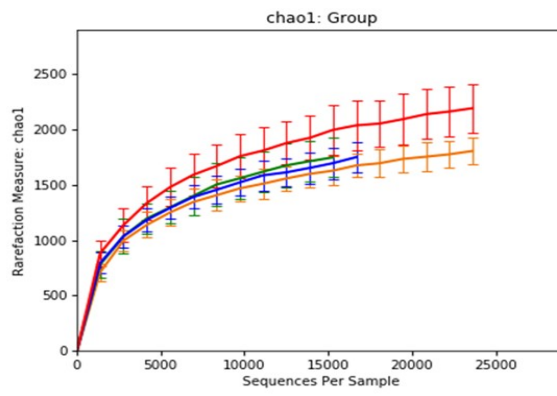

c

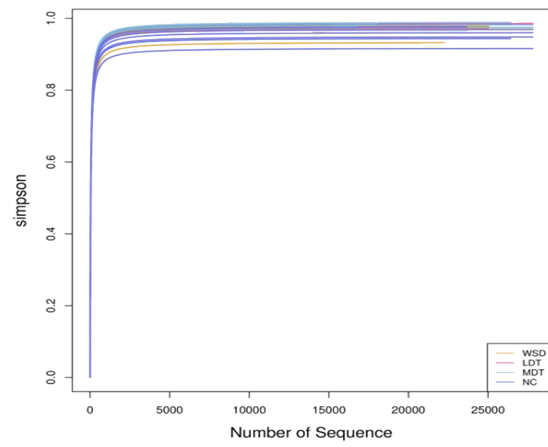

d

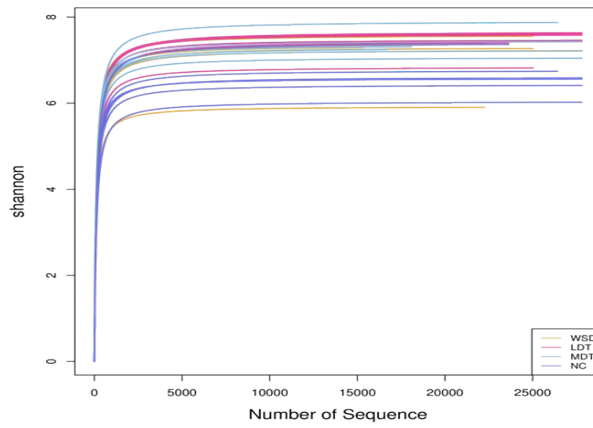

e

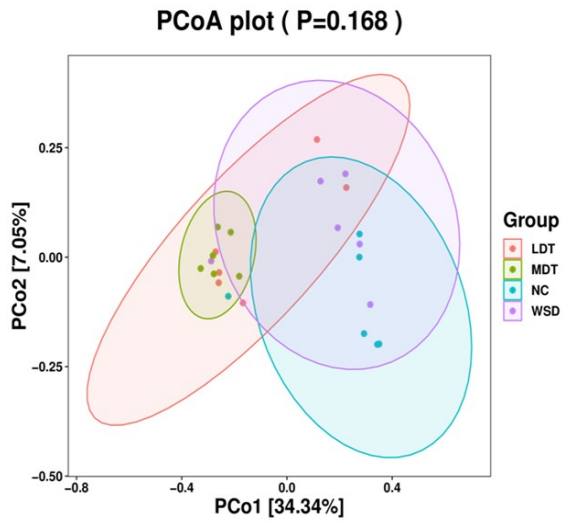

f

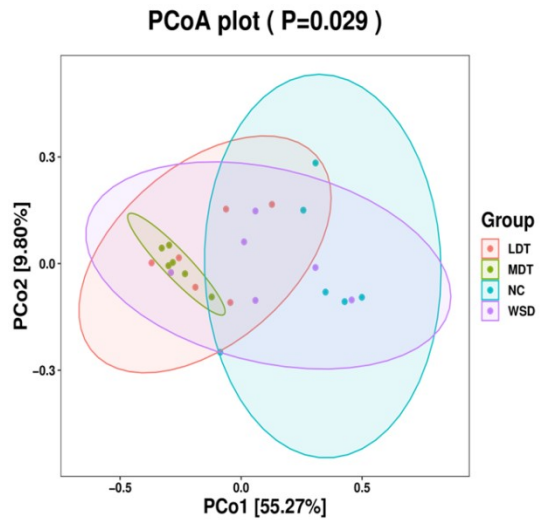

**Figure S1:** Diversity and richness of bacterial taxa after 28 days of formononetin treatment in groups WSD,NC,MDT,LDT DIO mice model male and female **(a)** Indicates refraction measures OTU **(b)** Chao 1 measure **(c)** Simpson index of each group **(d)** Shanon index of each group **(e-f)** PCoA plot based on unweight and weight plots respectively.

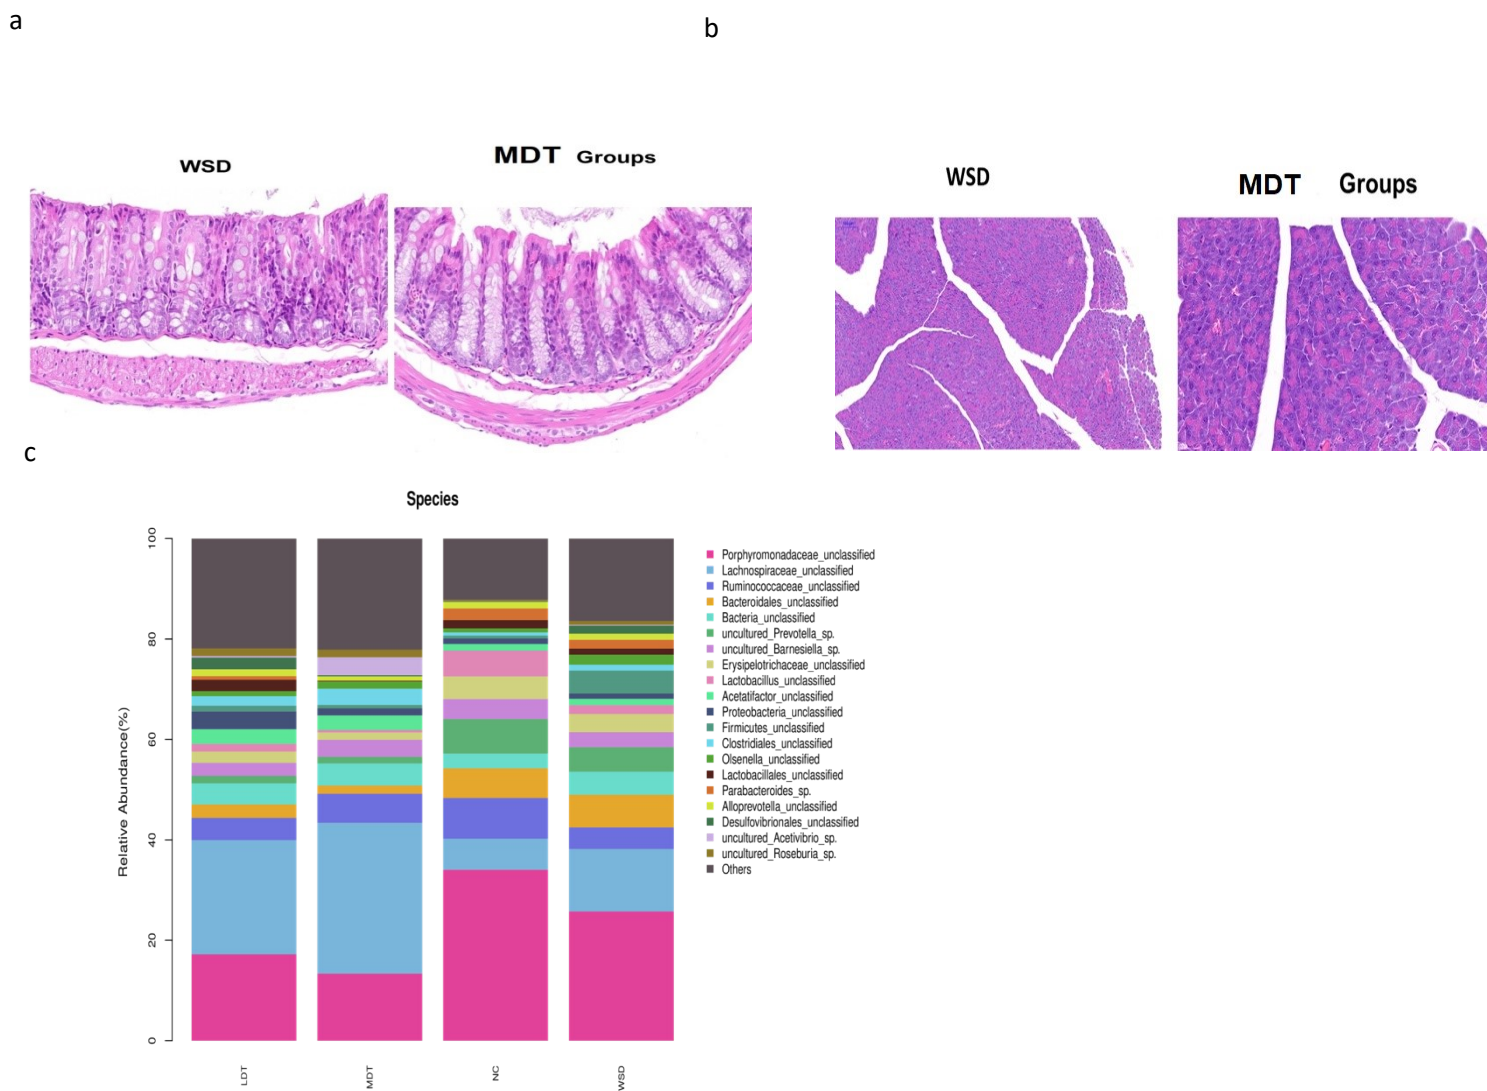

**Figure S2:** H&E staining of caecum and pancreatic tissues **(a)** Illustrative H&E sections of the caecum tissues in male and female mice. WSD control group indicate colon atrophy, inflammation and goblet cell reduction, MDT indicating increase goblet cell number and reduced epithelia damage, **(b)** Pancreatic tissue MDT significantly improved acinic cells and enhanced growth of Langerhans cells and reduced the damage while WSD feed pancreas displayed atrophy of acini of exocrine pancreas and degeneration of Islet of Langerhans **(c)** Relative abundance of gut microbiota at specie level bar chart showing bacterial community abundance between WSD,NC,MDT and LDT.

**Table S1:** Composition of the Western style diet

| <b>Formula</b>                              | <b>g/kg</b> |
|---------------------------------------------|-------------|
| Casein                                      | 236.0       |
| DL-Methionine                               | 3.54        |
| Sucrose                                     | 182.62      |
| Corn Starch                                 | 160.        |
| Maltodextrin                                | 120.0       |
| Vegetable Shortening, hydrogenated (Primex) | 100.0       |
| Beef Tallow                                 | 100.0       |
| Cellulose                                   | 40.0        |
| Calcium Phosphate, dibasic                  | 4.72        |
| Vitamin Mix, Teklad (40060)                 | 11.8        |
| Mineral mix AIN-93G-MX (94046)              | 41.3        |
| Ethoxyquin, antioxidant                     | 0.02        |

**Table S2:** miRNA Primers used for the real-time PCR

| <b>miRNA</b>      | <b>Primers</b>                |
|-------------------|-------------------------------|
| Mmu-miR 200a-F    | GCGTCCTAACACTGTCTGGT          |
| Mmu-miR- 122-F    | GGCTGTGGAGTGTGACAATG          |
| Mmu-miR- 29b-F    | GCCGTTAGCACCATTGAAATC         |
| Mmu-miR- 146a -F  | GCCGCCCTGTGAAATTCAGTT         |
| Mmu-miR- 200C-F   | TAATACTTGCCGGCTAATGGTAATGATGA |
| Mmu-miR-21-F      | GCCCGCTAGCTTATCAGACTGATG      |
| Mmu-miR-7b-F      | GCCGCTGAGGTAGGTTGTGT          |
| Mmu-miR-7d -F     | GCCGCAGAGGTAGTAGGTTGC         |
| Mmu-miR-7e-F      | TGCCGGTGAGGTAGGAGG            |
| Mmu-miR666-3P-F   | GGACGGTAGCAAGCAAAGAGTGTG      |
| mmu-miR-let-7a--F | GCCGCTGAGGTAGTAGGTTGT         |
| Mmu-miR-182-F     | TTTGGCAATGGTAGAACTCA          |
| Mmu-miR-181A-6P-F | AACATTCAACGCTGTCGGTGAGT       |

**Table S3:** mRNA primers used for qPCR

| <b>Gene</b>     | <b>Primer</b>                                                                  |
|-----------------|--------------------------------------------------------------------------------|
| Occludin        | Forward 5'-AGTACATGGCTGCTGATG -3'<br>Reverse 5'-CCCACCATCCTCTTGATGTGT -3'      |
| IL-6            | Forward 5'- GTTGCCTTCTGGGACTGATGT-3'<br>Reverse 5'-TCTGTTGTGGGTGGTATCCTCTG -3' |
| GAPDH           | Forward 5'-CACCCACTCCTCCACCTTTGA-3'<br>Reverse 5'-TCTCTCTCCTCTTGTGCTCTTGC -3'  |
| IL-22           | 5'-CACTTATCAACTGTTGACAC-3'<br>5'-GTTTTCTAGCTTCTTCTC-GC-3'                      |
| MUC-2           | Forward 5'-CACTGCGATGCCAACGACA -3'<br>Reverse 5'-GCCACTAACTGCTTGTTACCTGTA -3'  |
| TNF $\alpha$ -F | Forward 5'-GCTCAGAGCTTTCAACAAC-3'<br>Reverse 5'-AAGGTCTGAAGGTAGGAAGG-3'        |
